# Supplementary material
Source: ML conference proceedings conference paper supplement (https://openreview.net/forum?id=oWk2dULs1x)
Supplement: supplementary_material [file attachment]

# Supplemental Materials for: Evaluating Adversarial Attacks on ImageNet: A Reality Check on Misclassification Classes

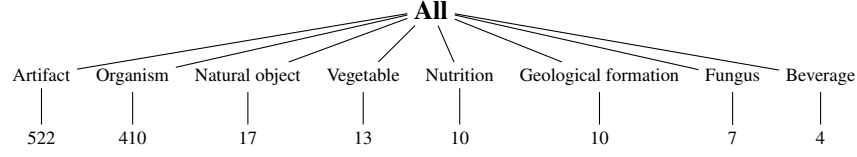

(a) Main branches of the ImageNet class hierarchy and the number of classes within those branches.

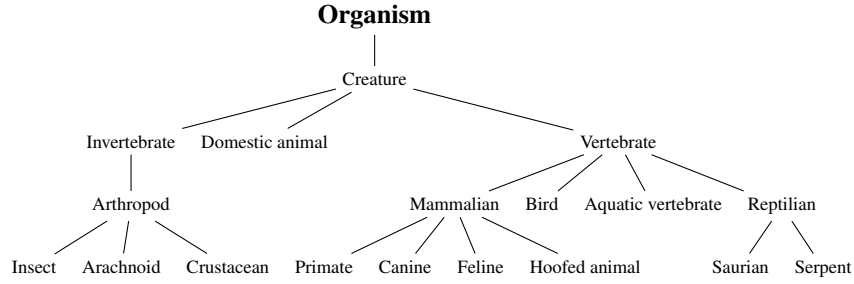

(b) ImageNet *Organism* sub-tree.

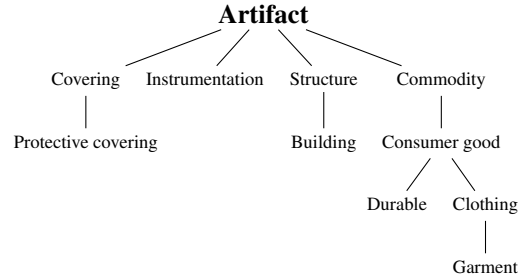

(c) ImageNet *Artifact* sub-tree.

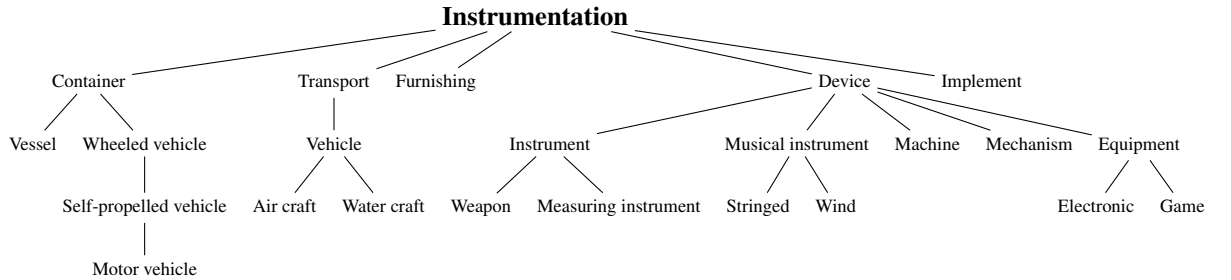

(d) ImageNet *Instrumentation* sub-tree under *Artifact* branch.

Figure I: The ImageNet class hierarchy: (a) main branches and the number of classes that lie in those branches, (b) view of *Organism* sub-tree, (c) view of *Artifact* sub-tree, and (d) view of *Instrumentation* sub-tree.

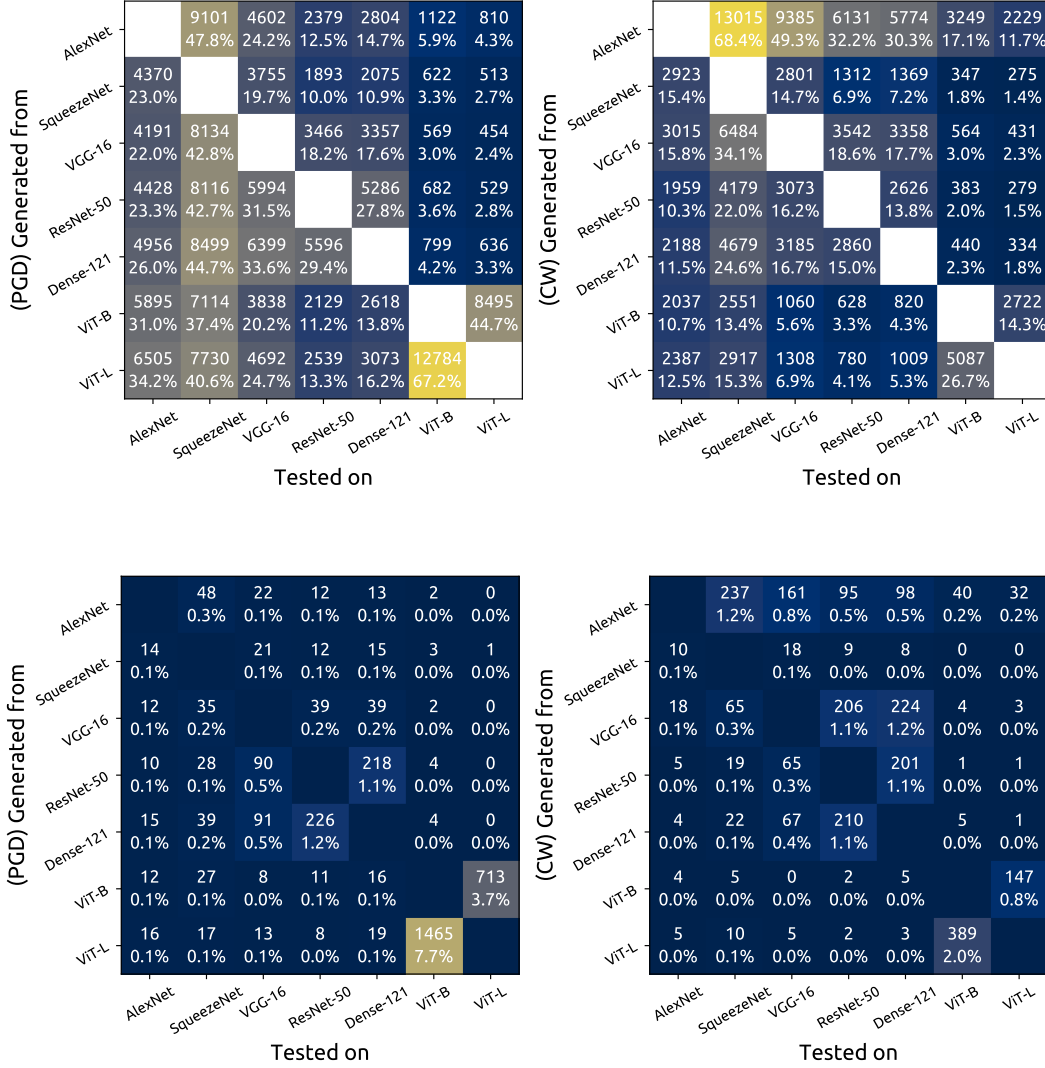

Figure II: Number (percentage) of source images that became adversarial examples with PGD (*left*) and CW (*right*). Adversarial examples are generated by the models listed along the *y*-axis and tested by the models listed along the *x*-axis. The two figures at the top display untargeted transferability successes, whereas the two figures at the bottom display targeted transferability successes.

Table I: For the adversarial examples that achieved model-to-model transferability and that have been created with **PGD** and **CW**, intra-collection misclassifications and misclassifications into the top-{3,5} prediction classes in the target models are provided. The results for the adversarial examples are grouped into collections according to the classes of their source image origins.

| Hierarchy   | Collection             | Classes in collection | Source images in collection | Adversarial examples originating from collection | Intra-collection misclassifications |              | Misclassification into top-K classes |       |
|-------------|------------------------|-----------------------|-----------------------------|--------------------------------------------------|-------------------------------------|--------------|--------------------------------------|-------|
|             |                        |                       |                             |                                                  | Count                               | %            | Top-3                                | Top-5 |
|             | All                    | 1000                  | 19,025                      | 289,244                                          | 289,244                             | 100.0%       | 59.6%                                | 71.1% |
| 1           | Organism               | 410                   | 9,390                       | 147,621                                          | 132,865                             | <b>90.0%</b> | 61.2%                                | 72.8% |
| 1.1         | Creature               | 398                   | 9,009                       | 143,996                                          | 130,409                             | <b>90.6%</b> | 61.4%                                | 73.1% |
| 1.1.1       | Domesticated animal    | 123                   | 2,316                       | 50,036                                           | 41,978                              | <b>83.9%</b> | 63.4%                                | 75.6% |
| 1.1.2       | Vertebrate             | 337                   | 7,692                       | 126,913                                          | 112,828                             | <b>88.9%</b> | 61.3%                                | 73.2% |
| 1.1.2.1     | Mammalian              | 218                   | 4,665                       | 89,004                                           | 76,351                              | <b>85.8%</b> | 61.4%                                | 73.5% |
| 1.1.2.1.1   | Primate                | 20                    | 475                         | 9,333                                            | 5,301                               | <b>56.8%</b> | 58.9%                                | 70.4% |
| 1.1.2.1.2   | Hoofed mammal          | 17                    | 419                         | 6,206                                            | 2,751                               | 44.3%        | 58.4%                                | 71.6% |
| 1.1.2.1.3   | Feline                 | 13                    | 319                         | 3,895                                            | 1,998                               | <b>51.3%</b> | 64.3%                                | 75.9% |
| 1.1.2.1.4   | Canine                 | 130                   | 2,502                       | 53,294                                           | 45,089                              | <b>84.6%</b> | 63.5%                                | 75.7% |
| 1.1.2.2     | Aquatic vertebrate     | 16                    | 366                         | 5,355                                            | 2,383                               | 44.5%        | 65.0%                                | 75.6% |
| 1.1.2.3     | Bird                   | 59                    | 1,937                       | 22,402                                           | 15,993                              | <b>71.4%</b> | 59.8%                                | 71.3% |
| 1.1.2.4     | Reptilian              | 36                    | 547                         | 7,635                                            | 4,795                               | <b>62.8%</b> | 63.8%                                | 75.2% |
| 1.1.2.4.1   | Saurian                | 11                    | 188                         | 2,416                                            | 1,050                               | 43.5%        | 58.4%                                | 71.1% |
| 1.1.2.4.2   | Serpent                | 17                    | 223                         | 3,202                                            | 1,700                               | <b>53.1%</b> | 67.0%                                | 77.1% |
| 1.1.3       | Invertebrate           | 61                    | 1,317                       | 17,083                                           | 10,698                              | <b>62.6%</b> | 61.9%                                | 72.3% |
| 1.1.3.1     | Arthropod              | 47                    | 1,018                       | 13,200                                           | 8,863                               | <b>67.1%</b> | 63.1%                                | 73.5% |
| 1.1.3.1.1   | Insect                 | 27                    | 652                         | 7,850                                            | 4,468                               | <b>56.9%</b> | 59.9%                                | 70.5% |
| 1.1.3.1.2   | Arachnoid              | 9                     | 189                         | 2,824                                            | 1,476                               | <b>52.3%</b> | 69.7%                                | 79.5% |
| 1.1.3.1.3   | Crustacean             | 9                     | 137                         | 2,035                                            | 955                                 | 46.9%        | 70.0%                                | 80.1% |
| 2           | Artifact               | 522                   | 8,397                       | 119,957                                          | 107,081                             | <b>89.3%</b> | 58.6%                                | 70.2% |
| 2.1         | Commodity              | 63                    | 906                         | 16,092                                           | 5,411                               | 33.6%        | 55.5%                                | 68.6% |
| 2.1.1       | Consumer Good          | 62                    | 896                         | 15,923                                           | 5,205                               | 32.7%        | 55.5%                                | 68.6% |
| 2.1.1.1     | Clothing               | 49                    | 670                         | 12,010                                           | 4,660                               | 38.8%        | 57.5%                                | 70.8% |
| 2.1.1.1.1   | Garment                | 24                    | 295                         | 6,218                                            | 1,455                               | 23.4%        | 56.4%                                | 70.7% |
| 2.1.1.2     | Durable                | 13                    | 226                         | 3,913                                            | 331                                 | 8.5%         | 49.6%                                | 61.8% |
| 2.2         | Covering               | 90                    | 1,287                       | 20,928                                           | 9,182                               | 43.9%        | 59.4%                                | 71.9% |
| 2.2.1       | Protective covering    | 27                    | 407                         | 6,021                                            | 766                                 | 12.7%        | 64.6%                                | 75.7% |
| 2.3         | Instrumentation        | 353                   | 5,963                       | 80,638                                           | 55,364                              | <b>68.7%</b> | 58.0%                                | 69.7% |
| 2.3.1       | Container              | 99                    | 1,528                       | 20,779                                           | 10,701                              | <b>51.5%</b> | 62.9%                                | 73.5% |
| 2.3.1.1     | Vessel                 | 23                    | 261                         | 4,515                                            | 1,373                               | 30.4%        | 57.2%                                | 67.9% |
| 2.3.1.2     | Wheeled vehicle        | 43                    | 879                         | 9,288                                            | 5,445                               | <b>58.6%</b> | 70.4%                                | 80.0% |
| 2.3.1.2.1   | Self-propelled vehicle | 31                    | 627                         | 6,761                                            | 3,336                               | 49.3%        | 69.5%                                | 79.7% |
| 2.3.1.2.1.1 | Motor vehicle          | 22                    | 400                         | 4,654                                            | 2,198                               | 47.2%        | 67.6%                                | 79.3% |
| 2.3.2       | Transport              | 71                    | 1,558                       | 17,929                                           | 10,643                              | <b>59.4%</b> | 64.5%                                | 75.2% |
| 2.3.2.1     | Vehicle                | 66                    | 1,439                       | 16,790                                           | 9,439                               | <b>56.2%</b> | 64.3%                                | 75.0% |
| 2.3.2.1.1   | Air craft              | 4                     | 101                         | 1,885                                            | 291                                 | 15.4%        | 50.7%                                | 62.2% |
| 2.3.2.1.2   | Water craft            | 15                    | 367                         | 4,400                                            | 1,854                               | 42.1%        | 59.5%                                | 72.0% |
| 2.3.3       | Device                 | 125                   | 1,901                       | 24,436                                           | 8,235                               | 33.7%        | 57.5%                                | 68.7% |
| 2.3.3.1     | Instrument             | 28                    | 374                         | 4,999                                            | 1,330                               | 26.6%        | 57.6%                                | 68.7% |
| 2.3.3.1.1   | Measuring instrument   | 12                    | 202                         | 2,605                                            | 716                                 | 27.5%        | 57.5%                                | 67.4% |
| 2.3.3.1.2   | Weapon                 | 7                     | 69                          | 914                                              | 150                                 | 16.4%        | 63.6%                                | 72.2% |
| 2.3.3.2     | Machine                | 14                    | 223                         | 2,527                                            | 496                                 | 19.6%        | 69.7%                                | 80.3% |
| 2.3.3.3     | Mechanism              | 12                    | 219                         | 2,814                                            | 45                                  | 1.6%         | 52.4%                                | 63.8% |
| 2.3.3.4     | Musical instrument     | 26                    | 427                         | 4,756                                            | 1,835                               | 38.6%        | 63.4%                                | 74.1% |
| 2.3.3.4.1   | Stringed instrument    | 8                     | 158                         | 1,665                                            | 515                                 | 30.9%        | 61.7%                                | 72.9% |
| 2.3.3.4.2   | Wind instrument        | 12                    | 188                         | 2,080                                            | 573                                 | 27.5%        | 63.3%                                | 73.8% |
| 2.3.4       | Equipment              | 37                    | 738                         | 11,470                                           | 2,379                               | 20.7%        | 50.2%                                | 63.6% |
| 2.3.4.1     | Electronic equipment   | 13                    | 178                         | 3,122                                            | 394                                 | 12.6%        | 52.0%                                | 64.9% |
| 2.3.4.2     | Game equipment         | 13                    | 321                         | 3,983                                            | 763                                 | 19.2%        | 56.3%                                | 67.7% |
| 2.3.5       | Furnishing             | 25                    | 447                         | 7,554                                            | 1,774                               | 23.5%        | 57.2%                                | 69.6% |
| 2.3.6       | Implement              | 38                    | 409                         | 7,452                                            | 1,657                               | 22.2%        | 57.2%                                | 69.0% |
| 2.4         | Structure              | 57                    | 1,035                       | 12,799                                           | 5,349                               | 41.8%        | 62.3%                                | 72.1% |
| 2.4.1       | Building               | 14                    | 293                         | 3,428                                            | 663                                 | 19.3%        | 66.0%                                | 76.5% |
| 3           | Geological formation   | 10                    | 139                         | 3,631                                            | 1,439                               | 39.6%        | 49.4%                                | 61.2% |
| 3.1         | Natural elevation      | 5                     | 65                          | 1,705                                            | 219                                 | 12.8%        | 47.6%                                | 60.1% |
| 4           | Natural object         | 17                    | 379                         | 5,734                                            | 1,700                               | 29.6%        | 52.8%                                | 63.4% |
| 4.1         | Plant                  | 16                    | 363                         | 5,207                                            | 1,700                               | 32.6%        | 53.7%                                | 63.9% |
| 4.1.1       | Fruit                  | 16                    | 363                         | 5,207                                            | 1,700                               | 32.6%        | 53.7%                                | 63.9% |
| 4.1.1.1     | Edible fruit           | 10                    | 233                         | 3,564                                            | 819                                 | 23.0%        | 49.7%                                | 60.5% |
| 5           | Fungus                 | 7                     | 226                         | 2,307                                            | 544                                 | 23.6%        | 56.1%                                | 66.4% |
| 6           | Nutrition              | 10                    | 157                         | 3,017                                            | 528                                 | 17.5%        | 54.8%                                | 64.1% |
| 7           | Vegetable              | 13                    | 278                         | 4,368                                            | 1,230                               | 28.2%        | 56.5%                                | 67.7% |
| 8           | Beverage               | 4                     | 40                          | 1,226                                            | 165                                 | 13.5%        | 64.4%                                | 74.3% |

Table II: For the adversarial examples that achieved model-to-model transferability and that have been created with **PGD**, intra-collection misclassifications and misclassifications into the top-{3,5} prediction classes in the target models are provided. The results for the adversarial examples are grouped into collections according to the classes of their source image origins.

| Hierarchy   | Collection             | Classes in collection | Source images in collection | Adversarial examples originating from collection | Intra-collection misclassifications |              | Misclassification into top-K classes |       |
|-------------|------------------------|-----------------------|-----------------------------|--------------------------------------------------|-------------------------------------|--------------|--------------------------------------|-------|
|             |                        |                       |                             |                                                  | Count                               | %            | Top-3                                | Top-5 |
|             | All                    | 1000                  | 19,025                      | 173,549                                          | 173,549                             | 100.0%       | 59.5%                                | 71.5% |
| 1           | Organism               | 410                   | 9,390                       | 84,734                                           | 75,882                              | <b>89.6%</b> | 62.0%                                | 74.0% |
| 1.1         | Creature               | 398                   | 9,009                       | 82,599                                           | 74,498                              | <b>90.2%</b> | 62.3%                                | 74.2% |
| 1.1.1       | Domesticated animal    | 123                   | 2,316                       | 28,385                                           | 23,898                              | <b>84.2%</b> | 64.6%                                | 77.2% |
| 1.1.2       | Vertebrate             | 337                   | 7,692                       | 72,329                                           | 64,258                              | <b>88.8%</b> | 62.3%                                | 74.5% |
| 1.1.2.1     | Mammalian              | 218                   | 4,665                       | 50,125                                           | 43,705                              | <b>87.2%</b> | 62.9%                                | 75.5% |
| 1.1.2.1.1   | Primate                | 20                    | 475                         | 5,123                                            | 2,999                               | <b>58.5%</b> | 60.4%                                | 72.5% |
| 1.1.2.1.2   | Hoofed mammal          | 17                    | 419                         | 3,460                                            | 1,541                               | 44.5%        | 60.2%                                | 74.0% |
| 1.1.2.1.3   | Feline                 | 13                    | 319                         | 2,346                                            | 1,262                               | <b>53.8%</b> | 65.9%                                | 78.5% |
| 1.1.2.1.4   | Canine                 | 130                   | 2,502                       | 30,094                                           | 25,784                              | <b>85.7%</b> | 64.8%                                | 77.5% |
| 1.1.2.2     | Aquatic vertebrate     | 16                    | 366                         | 3,273                                            | 1,426                               | 43.6%        | 64.7%                                | 75.4% |
| 1.1.2.3     | Bird                   | 59                    | 1,937                       | 12,878                                           | 9,013                               | <b>70.0%</b> | 60.3%                                | 71.4% |
| 1.1.2.4     | Reptilian              | 36                    | 547                         | 4,549                                            | 2,829                               | <b>62.2%</b> | 62.7%                                | 75.2% |
| 1.1.2.4.1   | Saurian                | 11                    | 188                         | 1,449                                            | 610                                 | 42.1%        | 56.5%                                | 70.2% |
| 1.1.2.4.2   | Serpent                | 17                    | 223                         | 1,931                                            | 1,013                               | <b>52.5%</b> | 66.0%                                | 77.3% |
| 1.1.3       | Invertebrate           | 61                    | 1,317                       | 10,270                                           | 6,329                               | <b>61.6%</b> | 62.0%                                | 72.5% |
| 1.1.3.1     | Arthropod              | 47                    | 1,018                       | 7,893                                            | 5,200                               | <b>65.9%</b> | 63.1%                                | 73.7% |
| 1.1.3.1.1   | Insect                 | 27                    | 652                         | 4,650                                            | 2,566                               | <b>55.2%</b> | 59.7%                                | 70.5% |
| 1.1.3.1.2   | Arachnoid              | 9                     | 189                         | 1,700                                            | 932                                 | <b>54.8%</b> | 70.0%                                | 80.1% |
| 1.1.3.1.3   | Crustacean             | 9                     | 137                         | 1,247                                            | 571                                 | 45.8%        | 70.2%                                | 80.5% |
| 2           | Artifact               | 522                   | 8,397                       | 75,248                                           | 67,853                              | <b>90.2%</b> | 57.7%                                | 70.0% |
| 2.1         | Commodity              | 63                    | 906                         | 10,204                                           | 3,428                               | 33.6%        | 54.7%                                | 68.5% |
| 2.1.1       | Consumer Good          | 62                    | 896                         | 10,107                                           | 3,290                               | 32.6%        | 54.7%                                | 68.4% |
| 2.1.1.1     | Clothing               | 49                    | 670                         | 7,515                                            | 2,984                               | 39.7%        | 56.8%                                | 71.0% |
| 2.1.1.1.1   | Garment                | 24                    | 295                         | 3,877                                            | 928                                 | 23.9%        | 55.4%                                | 70.6% |
| 2.1.1.2     | Durable                | 13                    | 226                         | 2,592                                            | 187                                 | 7.2%         | 48.3%                                | 60.8% |
| 2.2         | Covering               | 90                    | 1,287                       | 13,113                                           | 5,846                               | 44.6%        | 58.3%                                | 71.6% |
| 2.2.1       | Protective covering    | 27                    | 407                         | 3,793                                            | 511                                 | 13.5%        | 63.2%                                | 74.7% |
| 2.3         | Instrumentation        | 353                   | 5,963                       | 50,597                                           | 34,722                              | <b>68.6%</b> | 57.1%                                | 69.4% |
| 2.3.1       | Container              | 99                    | 1,528                       | 12,966                                           | 6,622                               | <b>51.1%</b> | 61.8%                                | 72.9% |
| 2.3.1.1     | Vessel                 | 23                    | 261                         | 2,789                                            | 804                                 | 28.8%        | 55.3%                                | 66.0% |
| 2.3.1.2     | Wheeled vehicle        | 43                    | 879                         | 5,791                                            | 3,403                               | <b>58.8%</b> | 70.1%                                | 80.2% |
| 2.3.1.2.1   | Self-propelled vehicle | 31                    | 627                         | 4,262                                            | 2,126                               | 49.9%        | 69.4%                                | 80.2% |
| 2.3.1.2.1.1 | Motor vehicle          | 22                    | 400                         | 2,953                                            | 1,406                               | 47.6%        | 67.7%                                | 80.1% |
| 2.3.2       | Transport              | 71                    | 1,558                       | 11,340                                           | 6,725                               | <b>59.3%</b> | 63.8%                                | 75.1% |
| 2.3.2.1     | Vehicle                | 66                    | 1,439                       | 10,604                                           | 5,946                               | <b>56.1%</b> | 63.6%                                | 74.9% |
| 2.3.2.1.1   | Air craft              | 4                     | 101                         | 1,180                                            | 193                                 | 16.4%        | 49.0%                                | 61.6% |
| 2.3.2.1.2   | Water craft            | 15                    | 367                         | 2,845                                            | 1,167                               | 41.0%        | 58.9%                                | 71.7% |
| 2.3.3       | Device                 | 125                   | 1,901                       | 15,419                                           | 5,212                               | 33.8%        | 56.7%                                | 68.8% |
| 2.3.3.1     | Instrument             | 28                    | 374                         | 3,088                                            | 836                                 | 27.1%        | 58.0%                                | 69.3% |
| 2.3.3.1.1   | Measuring instrument   | 12                    | 202                         | 1,624                                            | 468                                 | 28.8%        | 57.3%                                | 67.4% |
| 2.3.3.1.2   | Weapon                 | 7                     | 69                          | 527                                              | 86                                  | 16.3%        | 66.6%                                | 74.8% |
| 2.3.3.2     | Machine                | 14                    | 223                         | 1,690                                            | 293                                 | 17.3%        | 67.6%                                | 79.2% |
| 2.3.3.3     | Mechanism              | 12                    | 219                         | 1,809                                            | 29                                  | 1.6%         | 51.1%                                | 63.1% |
| 2.3.3.4     | Musical instrument     | 26                    | 427                         | 2,912                                            | 1,155                               | 39.7%        | 62.7%                                | 75.2% |
| 2.3.3.4.1   | Stringed instrument    | 8                     | 158                         | 1,015                                            | 324                                 | 31.9%        | 61.1%                                | 74.3% |
| 2.3.3.4.2   | Wind instrument        | 12                    | 188                         | 1,283                                            | 374                                 | 29.2%        | 63.0%                                | 74.8% |
| 2.3.4       | Equipment              | 37                    | 738                         | 7,257                                            | 1,555                               | 21.4%        | 49.4%                                | 64.0% |
| 2.3.4.1     | Electronic equipment   | 13                    | 178                         | 1,947                                            | 251                                 | 12.9%        | 49.3%                                | 63.5% |
| 2.3.4.2     | Game equipment         | 13                    | 321                         | 2,538                                            | 510                                 | 20.1%        | 57.1%                                | 69.3% |
| 2.3.5       | Furnishing             | 25                    | 447                         | 4,697                                            | 1,067                               | 22.7%        | 55.5%                                | 68.4% |
| 2.3.6       | Implement              | 38                    | 409                         | 4,544                                            | 1,013                               | 22.3%        | 56.8%                                | 69.5% |
| 2.4         | Structure              | 57                    | 1,035                       | 7,998                                            | 3,404                               | 42.6%        | 62.5%                                | 72.8% |
| 2.4.1       | Building               | 14                    | 293                         | 2,137                                            | 431                                 | 20.2%        | 65.2%                                | 76.5% |
| 3           | Geological formation   | 10                    | 139                         | 2,250                                            | 860                                 | 38.2%        | 46.8%                                | 59.8% |
| 3.1         | Natural elevation      | 5                     | 65                          | 1,080                                            | 123                                 | 11.4%        | 44.1%                                | 58.2% |
| 4           | Natural object         | 17                    | 379                         | 3,590                                            | 1,105                               | 30.8%        | 52.2%                                | 64.3% |
| 4.1         | Plant                  | 16                    | 363                         | 3,238                                            | 1,105                               | 34.1%        | 53.6%                                | 64.8% |
| 4.1.1       | Fruit                  | 16                    | 363                         | 3,238                                            | 1,105                               | 34.1%        | 53.6%                                | 64.8% |
| 4.1.1.1     | Edible fruit           | 10                    | 233                         | 2,250                                            | 550                                 | 24.4%        | 49.0%                                | 61.1% |
| 5           | Fungus                 | 7                     | 226                         | 1,320                                            | 295                                 | 22.3%        | 55.4%                                | 65.9% |
| 6           | Nutrition              | 10                    | 157                         | 1,895                                            | 340                                 | 17.9%        | 53.9%                                | 63.9% |
| 7           | Vegetable              | 13                    | 278                         | 2,814                                            | 772                                 | 27.4%        | 56.1%                                | 68.0% |
| 8           | Beverage               | 4                     | 40                          | 767                                              | 93                                  | 12.1%        | 61.4%                                | 71.7% |

Table III: For the adversarial examples that achieved model-to-model transferability and that have been created with **CW**, intra-collection misclassifications and misclassifications into the top-{3,5} prediction classes in the target models are provided. The results for the adversarial examples are grouped into collections according to the classes of their source image origins.

| Hierarchy   | Collection             | Classes in collection | Source images in collection | Adversarial examples originating from collection | Intra-collection misclassifications |              | Misclassification into top-K classes |       |
|-------------|------------------------|-----------------------|-----------------------------|--------------------------------------------------|-------------------------------------|--------------|--------------------------------------|-------|
|             |                        |                       |                             |                                                  | Count                               | %            | Top-3                                | Top-5 |
|             | All                    | 1000                  | 19,025                      | 115,695                                          | 115,695                             | 100.0%       | 59.8%                                | 70.5% |
| 1           | Organism               | 410                   | 9,390                       | 62,887                                           | 56,983                              | <b>90.6%</b> | 60.1%                                | 71.3% |
| 1.1         | Creature               | 398                   | 9,009                       | 61,397                                           | 55,911                              | <b>91.1%</b> | 60.2%                                | 71.5% |
| 1.1.1       | Domesticated animal    | 123                   | 2,316                       | 21,651                                           | 18,080                              | <b>83.5%</b> | 61.8%                                | 73.5% |
| 1.1.2       | Vertebrate             | 337                   | 7,692                       | 54,584                                           | 48,570                              | <b>89.0%</b> | 60.0%                                | 71.4% |
| 1.1.2.1     | Mammalian              | 218                   | 4,665                       | 38,879                                           | 32,646                              | <b>84.0%</b> | 59.6%                                | 71.0% |
| 1.1.2.1.1   | Primate                | 20                    | 475                         | 4,210                                            | 2,302                               | <b>54.7%</b> | 57.1%                                | 67.8% |
| 1.1.2.1.2   | Hoofed mammal          | 17                    | 419                         | 2,746                                            | 1,210                               | 44.1%        | 56.2%                                | 68.6% |
| 1.1.2.1.3   | Feline                 | 13                    | 319                         | 1,549                                            | 736                                 | 47.5%        | 61.9%                                | 72.0% |
| 1.1.2.1.4   | Canine                 | 130                   | 2,502                       | 23,200                                           | 19,305                              | <b>83.2%</b> | 61.8%                                | 73.5% |
| 1.1.2.2     | Aquatic vertebrate     | 16                    | 366                         | 2,082                                            | 957                                 | 46.0%        | 65.6%                                | 75.9% |
| 1.1.2.3     | Bird                   | 59                    | 1,937                       | 9,524                                            | 6,980                               | <b>73.3%</b> | 59.2%                                | 71.1% |
| 1.1.2.4     | Reptilian              | 36                    | 547                         | 3,086                                            | 1,966                               | <b>63.7%</b> | 65.4%                                | 75.1% |
| 1.1.2.4.1   | Saurian                | 11                    | 188                         | 967                                              | 440                                 | 45.5%        | 61.4%                                | 72.4% |
| 1.1.2.4.2   | Serpent                | 17                    | 223                         | 1,271                                            | 687                                 | <b>54.1%</b> | 68.5%                                | 76.8% |
| 1.1.3       | Invertebrate           | 61                    | 1,317                       | 6,813                                            | 4,369                               | <b>64.1%</b> | 61.8%                                | 72.1% |
| 1.1.3.1     | Arthropod              | 47                    | 1,018                       | 5,307                                            | 3,663                               | <b>69.0%</b> | 63.0%                                | 73.3% |
| 1.1.3.1.1   | Insect                 | 27                    | 652                         | 3,200                                            | 1,902                               | <b>59.4%</b> | 60.2%                                | 70.5% |
| 1.1.3.1.2   | Arachnoid              | 9                     | 189                         | 1,124                                            | 544                                 | 48.4%        | 69.3%                                | 78.6% |
| 1.1.3.1.3   | Crustacean             | 9                     | 137                         | 788                                              | 384                                 | 48.7%        | 69.7%                                | 79.4% |
| 2           | Artifact               | 522                   | 8,397                       | 44,709                                           | 39,228                              | <b>87.7%</b> | 60.1%                                | 70.5% |
| 2.1         | Commodity              | 63                    | 906                         | 5,888                                            | 1,983                               | 33.7%        | 56.9%                                | 68.8% |
| 2.1.1       | Consumer Good          | 62                    | 896                         | 5,816                                            | 1,915                               | 32.9%        | 57.1%                                | 68.9% |
| 2.1.1.1     | Clothing               | 49                    | 670                         | 4,495                                            | 1,676                               | 37.3%        | 58.5%                                | 70.4% |
| 2.1.1.1.1   | Garment                | 24                    | 295                         | 2,341                                            | 527                                 | 22.5%        | 58.1%                                | 70.9% |
| 2.1.1.2     | Durable                | 13                    | 226                         | 1,321                                            | 144                                 | 10.9%        | 52.2%                                | 63.7% |
| 2.2         | Covering               | 90                    | 1,287                       | 7,815                                            | 3,336                               | 42.7%        | 61.1%                                | 72.4% |
| 2.2.1       | Protective covering    | 27                    | 407                         | 2,228                                            | 255                                 | 11.4%        | 66.9%                                | 77.4% |
| 2.3         | Instrumentation        | 353                   | 5,963                       | 30,041                                           | 20,642                              | <b>68.7%</b> | 59.7%                                | 70.1% |
| 2.3.1       | Container              | 99                    | 1,528                       | 7,813                                            | 4,079                               | <b>52.2%</b> | 64.6%                                | 74.4% |
| 2.3.1.1     | Vessel                 | 23                    | 261                         | 1,726                                            | 569                                 | 33.0%        | 60.4%                                | 71.0% |
| 2.3.1.2     | Wheeled vehicle        | 43                    | 879                         | 3,497                                            | 2,042                               | <b>58.4%</b> | 71.1%                                | 79.5% |
| 2.3.1.2.1   | Self-propelled vehicle | 31                    | 627                         | 2,499                                            | 1,210                               | 48.4%        | 69.8%                                | 78.8% |
| 2.3.1.2.1.1 | Motor vehicle          | 22                    | 400                         | 1,701                                            | 792                                 | 46.6%        | 67.4%                                | 78.0% |
| 2.3.2       | Transport              | 71                    | 1,558                       | 6,589                                            | 3,918                               | <b>59.5%</b> | 65.7%                                | 75.4% |
| 2.3.2.1     | Vehicle                | 66                    | 1,439                       | 6,186                                            | 3,493                               | <b>56.5%</b> | 65.5%                                | 75.2% |
| 2.3.2.1.1   | Air craft              | 4                     | 101                         | 705                                              | 98                                  | 13.9%        | 53.5%                                | 63.1% |
| 2.3.2.1.2   | Water craft            | 15                    | 367                         | 1,555                                            | 687                                 | 44.2%        | 60.6%                                | 72.7% |
| 2.3.3       | Device                 | 125                   | 1,901                       | 9,017                                            | 3,023                               | 33.5%        | 58.9%                                | 68.6% |
| 2.3.3.1     | Instrument             | 28                    | 374                         | 1,911                                            | 494                                 | 25.9%        | 56.9%                                | 67.8% |
| 2.3.3.1.1   | Measuring instrument   | 12                    | 202                         | 981                                              | 248                                 | 25.3%        | 57.8%                                | 67.4% |
| 2.3.3.1.2   | Weapon                 | 7                     | 69                          | 387                                              | 64                                  | 16.5%        | 59.4%                                | 68.7% |
| 2.3.3.2     | Machine                | 14                    | 223                         | 837                                              | 203                                 | 24.3%        | 74.0%                                | 82.6% |
| 2.3.3.3     | Mechanism              | 12                    | 219                         | 1,005                                            | 16                                  | 1.6%         | 54.7%                                | 65.1% |
| 2.3.3.4     | Musical instrument     | 26                    | 427                         | 1,844                                            | 680                                 | 36.9%        | 64.5%                                | 72.4% |
| 2.3.3.4.1   | Stringed instrument    | 8                     | 158                         | 650                                              | 191                                 | 29.4%        | 62.8%                                | 70.8% |
| 2.3.3.4.2   | Wind instrument        | 12                    | 188                         | 797                                              | 199                                 | 25.0%        | 63.7%                                | 72.3% |
| 2.3.4       | Equipment              | 37                    | 738                         | 4,213                                            | 824                                 | 19.6%        | 51.7%                                | 62.8% |
| 2.3.4.1     | Electronic equipment   | 13                    | 178                         | 1,175                                            | 143                                 | 12.2%        | 56.4%                                | 67.2% |
| 2.3.4.2     | Game equipment         | 13                    | 321                         | 1,445                                            | 253                                 | 17.5%        | 54.9%                                | 64.8% |
| 2.3.5       | Furnishing             | 25                    | 447                         | 2,857                                            | 707                                 | 24.7%        | 60.0%                                | 71.6% |
| 2.3.6       | Implement              | 38                    | 409                         | 2,908                                            | 644                                 | 22.1%        | 57.9%                                | 68.3% |
| 2.4         | Structure              | 57                    | 1,035                       | 4,801                                            | 1,945                               | 40.5%        | 62.2%                                | 71.0% |
| 2.4.1       | Building               | 14                    | 293                         | 1,291                                            | 232                                 | 18.0%        | 67.4%                                | 76.4% |
| 3           | Geological formation   | 10                    | 139                         | 1,381                                            | 579                                 | 41.9%        | 53.8%                                | 63.4% |
| 3.1         | Natural elevation      | 5                     | 65                          | 625                                              | 96                                  | 15.4%        | 53.8%                                | 63.2% |
| 4           | Natural object         | 17                    | 379                         | 2,144                                            | 595                                 | 27.8%        | 53.7%                                | 61.9% |
| 4.1         | Plant                  | 16                    | 363                         | 1,969                                            | 595                                 | 30.2%        | 53.9%                                | 62.3% |
| 4.1.1       | Fruit                  | 16                    | 363                         | 1,969                                            | 595                                 | 30.2%        | 53.9%                                | 62.3% |
| 4.1.1.1     | Edible fruit           | 10                    | 233                         | 1,314                                            | 269                                 | 20.5%        | 50.9%                                | 59.5% |
| 5           | Fungus                 | 7                     | 226                         | 987                                              | 249                                 | 25.2%        | 57.1%                                | 67.2% |
| 6           | Nutrition              | 10                    | 157                         | 1,122                                            | 188                                 | 16.8%        | 56.3%                                | 64.4% |
| 7           | Vegetable              | 13                    | 278                         | 1,554                                            | 458                                 | 29.5%        | 57.3%                                | 67.3% |
| 8           | Beverage               | 4                     | 40                          | 459                                              | 72                                  | 15.7%        | 69.5%                                | 78.6% |

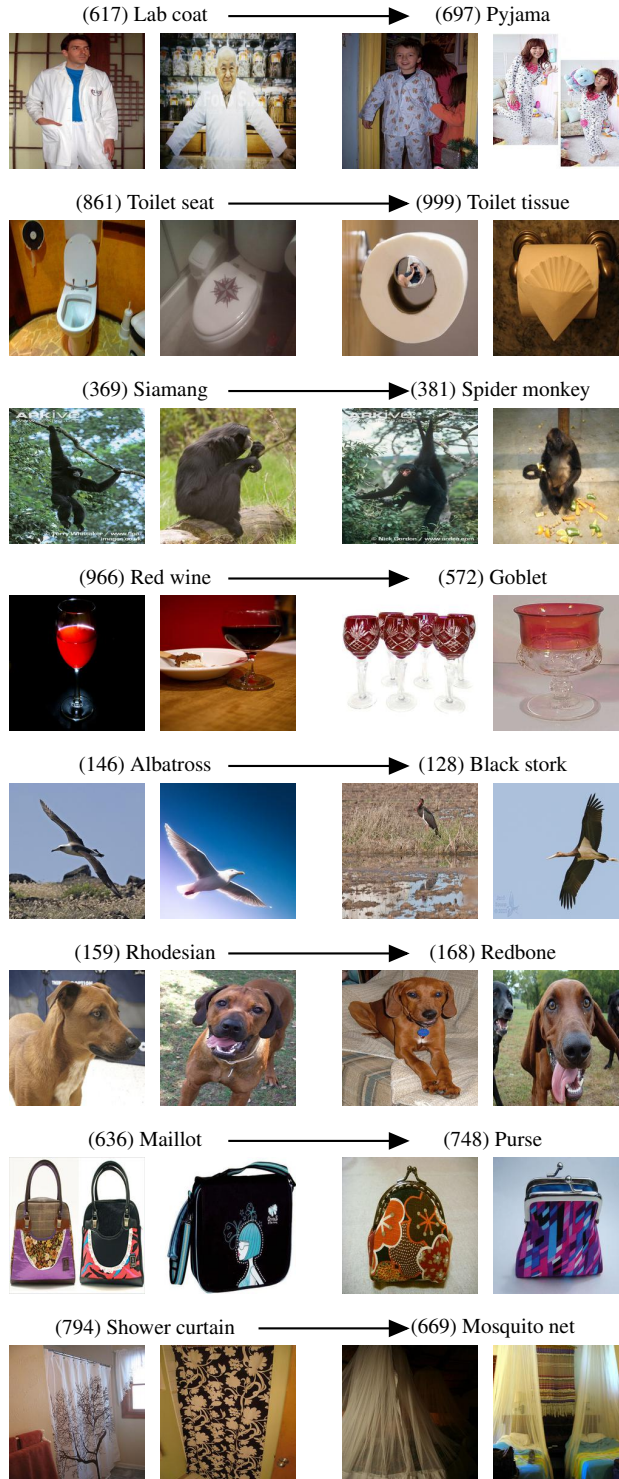

Figure III: Adversarial examples on the left are misclassified into the classes on the right by multiple models used in this study. The classes given on the right often lie in the top-5 predictions for the genuine source image counterparts of those adversarial examples.

Table IV: For the adversarial examples that achieved model-to-model transferability and that have been created with **PGD** and **CW**, intra-collection misclassifications and misclassifications into the top-{3,5} prediction classes in the target models are provided for each model employed in this study (1st column). The results for the adversarial examples are grouped into collections according to the classes of their source image origins. The results are provided for a number of collections that lie under the **Organism** sub-tree.

| Model        | Hierarchy | Collection         | Classes in collection | Source images in collection | Adversarial examples originating from collection | Intra-collection misclassifications |              | Misclassification into top-K classes |       |
|--------------|-----------|--------------------|-----------------------|-----------------------------|--------------------------------------------------|-------------------------------------|--------------|--------------------------------------|-------|
|              |           |                    |                       |                             |                                                  | Count                               | %            | Top-3                                | Top-5 |
| AlexNet      | 1         | Organism           | 410                   | 9,390                       | 23,841                                           | 21,977                              | <b>92.2%</b> | 76.0%                                | 86.8% |
|              | 1.1.2.1.1 | Primate            | 20                    | 475                         | 1,587                                            | 755                                 | 47.6%        | 78.3%                                | 88.6% |
|              | 1.1.2.1.2 | Hoofed mammal      | 17                    | 419                         | 1,044                                            | 420                                 | 40.2%        | 70.1%                                | 86.9% |
|              | 1.1.2.1.3 | Feline             | 13                    | 319                         | 781                                              | 354                                 | 45.3%        | 74.6%                                | 89.2% |
|              | 1.1.2.1.4 | Canine             | 130                   | 2,502                       | 8,709                                            | 7,112                               | <b>81.7%</b> | 77.2%                                | 87.7% |
|              | 1.1.2.2   | Aquatic vertebrate | 16                    | 366                         | 721                                              | 313                                 | 43.4%        | 84.6%                                | 92.8% |
|              | 1.1.2.3   | Bird               | 59                    | 1,937                       | 3,841                                            | 2,732                               | <b>71.1%</b> | 74.2%                                | 85.1% |
|              | 1.1.2.4   | Reptilian          | 36                    | 547                         | 1,415                                            | 832                                 | <b>58.8%</b> | 73.5%                                | 86.1% |
|              | 1.1.3     | Invertebrate       | 61                    | 1,317                       | 2,620                                            | 1,740                               | <b>66.4%</b> | 75.6%                                | 84.9% |
| SqueezeNet   | 1         | Organism           | 410                   | 9,390                       | 41,266                                           | 36,530                              | <b>88.5%</b> | 62.5%                                | 75.4% |
|              | 1.1.2.1.1 | Primate            | 20                    | 475                         | 2,589                                            | 1,235                               | 47.7%        | 61.7%                                | 73.7% |
|              | 1.1.2.1.2 | Hoofed mammal      | 17                    | 419                         | 1,909                                            | 699                                 | 36.6%        | 60.9%                                | 74.5% |
|              | 1.1.2.1.3 | Feline             | 13                    | 319                         | 1,267                                            | 563                                 | 44.4%        | 62.7%                                | 76.0% |
|              | 1.1.2.1.4 | Canine             | 130                   | 2,502                       | 13,931                                           | 11,172                              | <b>80.2%</b> | 63.2%                                | 76.5% |
|              | 1.1.2.2   | Aquatic vertebrate | 16                    | 366                         | 1,459                                            | 530                                 | 36.3%        | 66.0%                                | 77.9% |
|              | 1.1.2.3   | Bird               | 59                    | 1,937                       | 6,850                                            | 4,476                               | <b>65.3%</b> | 61.3%                                | 73.6% |
|              | 1.1.2.4   | Reptilian          | 36                    | 547                         | 2,349                                            | 1,348                               | <b>57.4%</b> | 65.7%                                | 78.2% |
|              | 1.1.3     | Invertebrate       | 61                    | 1,317                       | 4,900                                            | 2,615                               | <b>53.4%</b> | 62.1%                                | 74.8% |
| VGG-16       | 1         | Organism           | 410                   | 9,390                       | 25,580                                           | 23,658                              | <b>92.5%</b> | 56.1%                                | 68.7% |
|              | 1.1.2.1.1 | Primate            | 20                    | 475                         | 1,589                                            | 1,051                               | <b>66.1%</b> | 52.5%                                | 63.6% |
|              | 1.1.2.1.2 | Hoofed mammal      | 17                    | 419                         | 999                                              | 511                                 | <b>51.2%</b> | 53.6%                                | 66.6% |
|              | 1.1.2.1.3 | Feline             | 13                    | 319                         | 570                                              | 332                                 | <b>58.2%</b> | 62.3%                                | 73.3% |
|              | 1.1.2.1.4 | Canine             | 130                   | 2,502                       | 9,241                                            | 7,901                               | <b>85.5%</b> | 58.3%                                | 71.3% |
|              | 1.1.2.2   | Aquatic vertebrate | 16                    | 366                         | 1,017                                            | 472                                 | 46.4%        | 59.1%                                | 70.9% |
|              | 1.1.2.3   | Bird               | 59                    | 1,937                       | 4,085                                            | 3,200                               | <b>78.3%</b> | 55.0%                                | 68.6% |
|              | 1.1.2.4   | Reptilian          | 36                    | 547                         | 1,096                                            | 784                                 | <b>71.5%</b> | 62.0%                                | 75.8% |
|              | 1.1.3     | Invertebrate       | 61                    | 1,317                       | 2,969                                            | 1,933                               | <b>65.1%</b> | 57.5%                                | 67.7% |
| DenseNet-121 | 1         | Organism           | 410                   | 9,390                       | 16,477                                           | 15,181                              | <b>92.1%</b> | 64.3%                                | 75.3% |
|              | 1.1.2.1.1 | Primate            | 20                    | 475                         | 1,019                                            | 697                                 | <b>68.4%</b> | 61.7%                                | 73.7% |
|              | 1.1.2.1.2 | Hoofed mammal      | 17                    | 419                         | 650                                              | 335                                 | <b>51.5%</b> | 59.5%                                | 72.2% |
|              | 1.1.2.1.3 | Feline             | 13                    | 319                         | 248                                              | 161                                 | <b>64.9%</b> | 73.0%                                | 79.0% |
|              | 1.1.2.1.4 | Canine             | 130                   | 2,502                       | 6,150                                            | 5,596                               | <b>91.0%</b> | 67.6%                                | 79.9% |
|              | 1.1.2.2   | Aquatic vertebrate | 16                    | 366                         | 671                                              | 363                                 | <b>54.1%</b> | 67.1%                                | 76.5% |
|              | 1.1.2.3   | Bird               | 59                    | 1,937                       | 2,260                                            | 1,731                               | <b>76.6%</b> | 65.7%                                | 75.6% |
|              | 1.1.2.4   | Reptilian          | 36                    | 547                         | 844                                              | 551                                 | <b>65.3%</b> | 61.5%                                | 70.5% |
|              | 1.1.3     | Invertebrate       | 61                    | 1,317                       | 1,963                                            | 1,343                               | <b>68.4%</b> | 63.3%                                | 72.6% |
| ResNet-50    | 1         | Organism           | 410                   | 9,390                       | 17,487                                           | 15,948                              | 91.2%        | 59.6%                                | 70.8% |
|              | 1.1.2.1.1 | Primate            | 20                    | 475                         | 1,232                                            | 695                                 | <b>56.4%</b> | 50.0%                                | 62.9% |
|              | 1.1.2.1.2 | Hoofed mammal      | 17                    | 419                         | 790                                              | 407                                 | <b>51.5%</b> | 54.3%                                | 67.8% |
|              | 1.1.2.1.3 | Feline             | 13                    | 319                         | 318                                              | 217                                 | <b>68.2%</b> | 70.8%                                | 76.7% |
|              | 1.1.2.1.4 | Canine             | 130                   | 2,502                       | 6,346                                            | 5,566                               | <b>87.7%</b> | 62.4%                                | 74.2% |
|              | 1.1.2.2   | Aquatic vertebrate | 16                    | 366                         | 694                                              | 316                                 | 45.5%        | 60.5%                                | 70.2% |
|              | 1.1.2.3   | Bird               | 59                    | 1,937                       | 2,568                                            | 2,140                               | <b>83.3%</b> | 64.3%                                | 74.4% |
|              | 1.1.2.4   | Reptilian          | 36                    | 547                         | 749                                              | 520                                 | <b>69.4%</b> | 63.4%                                | 73.2% |
|              | 1.1.3     | Invertebrate       | 61                    | 1,317                       | 1,792                                            | 1,284                               | <b>71.7%</b> | 61.6%                                | 73.0% |
| Vit-Base     | 1         | Organism           | 410                   | 9,390                       | 13,952                                           | 11,835                              | <b>84.8%</b> | 45.6%                                | 55.6% |
|              | 1.1.2.1.1 | Primate            | 20                    | 475                         | 824                                              | 498                                 | <b>60.4%</b> | 37.3%                                | 49.3% |
|              | 1.1.2.1.2 | Hoofed mammal      | 17                    | 419                         | 490                                              | 224                                 | 45.7%        | 42.0%                                | 50.6% |
|              | 1.1.2.1.3 | Feline             | 13                    | 319                         | 409                                              | 209                                 | <b>51.1%</b> | 50.6%                                | 61.9% |
|              | 1.1.2.1.4 | Canine             | 130                   | 2,502                       | 5,308                                            | 4,550                               | <b>85.7%</b> | 52.5%                                | 64.0% |
|              | 1.1.2.2   | Aquatic vertebrate | 16                    | 366                         | 477                                              | 234                                 | 49.1%        | 49.5%                                | 61.8% |
|              | 1.1.2.3   | Bird               | 59                    | 1,937                       | 1,821                                            | 1,093                               | <b>60.0%</b> | 31.6%                                | 41.1% |
|              | 1.1.2.4   | Reptilian          | 36                    | 547                         | 754                                              | 475                                 | <b>63.0%</b> | 51.9%                                | 59.2% |
|              | 1.1.3     | Invertebrate       | 61                    | 1,317                       | 1,685                                            | 1,023                               | <b>60.7%</b> | 48.5%                                | 57.6% |
| Vit-Large    | 1         | Organism           | 410                   | 9,390                       | 9,018                                            | 7,736                               | <b>85.8%</b> | 52.4%                                | 62.0% |
|              | 1.1.2.1.1 | Primate            | 20                    | 475                         | 493                                              | 370                                 | <b>75.1%</b> | 55.2%                                | 63.5% |
|              | 1.1.2.1.2 | Hoofed mammal      | 17                    | 419                         | 324                                              | 155                                 | 47.8%        | 53.4%                                | 59.9% |
|              | 1.1.2.1.3 | Feline             | 13                    | 319                         | 302                                              | 162                                 | <b>53.6%</b> | 53.0%                                | 61.3% |
|              | 1.1.2.1.4 | Canine             | 130                   | 2,502                       | 3,609                                            | 3,192                               | <b>88.4%</b> | 56.2%                                | 68.3% |
|              | 1.1.2.2   | Aquatic vertebrate | 16                    | 366                         | 316                                              | 155                                 | 49.1%        | 63.9%                                | 71.5% |
|              | 1.1.2.3   | Bird               | 59                    | 1,937                       | 977                                              | 621                                 | <b>63.6%</b> | 40.9%                                | 49.4% |
|              | 1.1.2.4   | Reptilian          | 36                    | 547                         | 428                                              | 285                                 | <b>66.6%</b> | 52.1%                                | 61.7% |
|              | 1.1.3     | Invertebrate       | 61                    | 1,317                       | 1,154                                            | 760                                 | <b>65.9%</b> | 59.2%                                | 65.3% |

Table V: For the adversarial examples that achieved model-to-model transferability and that have been created with **PGD** and **CW**, intra-collection misclassifications and misclassifications into the top-{3,5} prediction classes in the target models are provided for each model employed in this study (1st column). The results for the adversarial examples are grouped into collections according to the classes of their source image origins. The results are provided for a number of collections that lie under the **Artifact** sub-tree.

| Model        | Hierarchy | Collection         | Classes in collection | Source images in collection | Adversarial examples originating from collection | Intra-collection misclassifications |              | Misclassification into top-K classes |       |
|--------------|-----------|--------------------|-----------------------|-----------------------------|--------------------------------------------------|-------------------------------------|--------------|--------------------------------------|-------|
|              |           |                    |                       |                             |                                                  | Count                               | %            | Top-3                                | Top-5 |
| AlexNet      | 2         | Artifact           | 522                   | 8,397                       | 18,149                                           | 16,341                              | <b>90.0%</b> | 72.5%                                | 83.8% |
|              | 2.1.1.1   | Clothing           | 49                    | 670                         | 1,790                                            | 833                                 | 46.5%        | 67.0%                                | 80.2% |
|              | 2.2       | Covering           | 90                    | 1,287                       | 2,960                                            | 1,386                               | 46.8%        | 68.4%                                | 81.2% |
|              | 2.3.1     | Container          | 99                    | 1,528                       | 3,396                                            | 1,806                               | <b>53.2%</b> | 79.3%                                | 86.8% |
|              | 2.3.1.2   | Wheeled vehicle    | 43                    | 879                         | 1,554                                            | 927                                 | <b>59.7%</b> | 84.6%                                | 92.9% |
|              | 2.3.3     | Device             | 125                   | 1,901                       | 4,099                                            | 1,385                               | 33.8%        | 71.8%                                | 83.8% |
|              | 2.3.3.4   | Musical instrument | 26                    | 427                         | 915                                              | 402                                 | 43.9%        | 74.4%                                | 86.0% |
|              | 2.3.4     | Equipment          | 37                    | 738                         | 1,778                                            | 355                                 | 20.0%        | 63.7%                                | 79.6% |
|              | 2.4       | Structure          | 57                    | 1,035                       | 1,733                                            | 876                                 | <b>50.5%</b> | 84.2%                                | 91.6% |
| SqueezeNet   | 2         | Artifact           | 522                   | 8,397                       | 35,748                                           | 32,165                              | <b>90.0%</b> | 58.7%                                | 71.0% |
|              | 2.1.1.1   | Clothing           | 49                    | 670                         | 3,474                                            | 1,038                               | 29.9%        | 58.8%                                | 72.4% |
|              | 2.2       | Covering           | 90                    | 1,287                       | 5,963                                            | 2,240                               | 37.6%        | 60.8%                                | 73.6% |
|              | 2.3.1     | Container          | 99                    | 1,528                       | 6,041                                            | 3,061                               | <b>50.7%</b> | 60.4%                                | 72.9% |
|              | 2.3.1.2   | Wheeled vehicle    | 43                    | 879                         | 2,958                                            | 1,646                               | <b>55.6%</b> | 66.5%                                | 78.0% |
|              | 2.3.3     | Device             | 125                   | 1,901                       | 7,781                                            | 2,282                               | 29.3%        | 57.7%                                | 70.5% |
|              | 2.3.3.4   | Musical instrument | 26                    | 427                         | 1,674                                            | 428                                 | 25.6%        | 62.5%                                | 75.0% |
|              | 2.3.4     | Equipment          | 37                    | 738                         | 3,732                                            | 588                                 | 15.8%        | 47.4%                                | 60.9% |
|              | 2.4       | Structure          | 57                    | 1,035                       | 3,344                                            | 1,573                               | 47.0%        | 65.5%                                | 76.6% |
| VGG-16       | 2         | Artifact           | 522                   | 8,397                       | 20,329                                           | 18,204                              | <b>89.5%</b> | 52.9%                                | 66.0% |
|              | 2.1.1.1   | Clothing           | 49                    | 670                         | 2,197                                            | 929                                 | 42.3%        | 50.2%                                | 64.7% |
|              | 2.2       | Covering           | 90                    | 1,287                       | 3,729                                            | 1,822                               | 48.9%        | 53.5%                                | 67.4% |
|              | 2.3.1     | Container          | 99                    | 1,528                       | 3,272                                            | 1,758                               | <b>53.7%</b> | 55.8%                                | 69.8% |
|              | 2.3.1.2   | Wheeled vehicle    | 43                    | 879                         | 1,221                                            | 784                                 | <b>64.2%</b> | 69.5%                                | 81.7% |
|              | 2.3.3     | Device             | 125                   | 1,901                       | 4,082                                            | 1,334                               | 32.7%        | 51.4%                                | 62.5% |
|              | 2.3.3.4   | Musical instrument | 26                    | 427                         | 697                                              | 265                                 | 38.0%        | 55.4%                                | 65.6% |
|              | 2.3.4     | Equipment          | 37                    | 738                         | 2,132                                            | 451                                 | 21.2%        | 47.0%                                | 60.0% |
|              | 2.4       | Structure          | 57                    | 1,035                       | 1,833                                            | 759                                 | 41.4%        | 56.9%                                | 68.4% |
| DenseNet-121 | 2         | Artifact           | 522                   | 8,397                       | 14,699                                           | 12,978                              | <b>88.3%</b> | 60.5%                                | 71.5% |
|              | 2.1.1.1   | Clothing           | 49                    | 670                         | 1,487                                            | 593                                 | 39.9%        | 56.6%                                | 70.5% |
|              | 2.2       | Covering           | 90                    | 1,287                       | 2,699                                            | 1,239                               | 45.9%        | 61.1%                                | 73.1% |
|              | 2.3.1     | Container          | 99                    | 1,528                       | 2,566                                            | 1,317                               | <b>51.3%</b> | 69.9%                                | 76.9% |
|              | 2.3.1.2   | Wheeled vehicle    | 43                    | 879                         | 1,122                                            | 678                                 | <b>60.4%</b> | 76.9%                                | 82.1% |
|              | 2.3.3     | Device             | 125                   | 1,901                       | 2,963                                            | 1,163                               | 39.3%        | 61.5%                                | 72.3% |
|              | 2.3.3.4   | Musical instrument | 26                    | 427                         | 577                                              | 310                                 | <b>53.7%</b> | 69.0%                                | 78.5% |
|              | 2.3.4     | Equipment          | 37                    | 738                         | 1,246                                            | 346                                 | 27.8%        | 50.0%                                | 63.0% |
|              | 2.4       | Structure          | 57                    | 1,035                       | 1,700                                            | 639                                 | 37.6%        | 63.5%                                | 72.4% |
| ResNet-50    | 2         | Artifact           | 522                   | 8,397                       | 12,887                                           | 11,576                              | <b>89.8%</b> | 57.7%                                | 69.2% |
|              | 2.1.1.1   | Clothing           | 49                    | 670                         | 1,352                                            | 528                                 | 39.1%        | 63.1%                                | 75.3% |
|              | 2.2       | Covering           | 90                    | 1,287                       | 2,376                                            | 1,112                               | 46.8%        | 64.7%                                | 76.4% |
|              | 2.3.1     | Container          | 99                    | 1,528                       | 2,210                                            | 1,156                               | <b>52.3%</b> | 62.3%                                | 73.1% |
|              | 2.3.1.2   | Wheeled vehicle    | 43                    | 879                         | 911                                              | 589                                 | <b>64.7%</b> | 73.4%                                | 82.8% |
|              | 2.3.3     | Device             | 125                   | 1,901                       | 2,285                                            | 832                                 | 36.4%        | 55.7%                                | 65.9% |
|              | 2.3.3.4   | Musical instrument | 26                    | 427                         | 341                                              | 180                                 | <b>52.8%</b> | 64.5%                                | 73.6% |
|              | 2.3.4     | Equipment          | 37                    | 738                         | 1,181                                            | 242                                 | 20.5%        | 48.9%                                | 62.1% |
|              | 2.4       | Structure          | 57                    | 1,035                       | 1,501                                            | 561                                 | 37.4%        | 57.5%                                | 68.9% |
| Vit-Base     | 2         | Artifact           | 522                   | 8,397                       | 10,771                                           | 9,359                               | <b>86.9%</b> | 47.1%                                | 56.2% |
|              | 2.1.1.1   | Clothing           | 49                    | 670                         | 1,042                                            | 454                                 | 43.6%        | 48.9%                                | 60.5% |
|              | 2.2       | Covering           | 90                    | 1,287                       | 1,918                                            | 837                                 | 43.6%        | 48.1%                                | 59.3% |
|              | 2.3.1     | Container          | 99                    | 1,528                       | 1,893                                            | 923                                 | 48.8%        | 49.3%                                | 58.4% |
|              | 2.3.1.2   | Wheeled vehicle    | 43                    | 879                         | 906                                              | 490                                 | <b>54.1%</b> | 54.3%                                | 62.4% |
|              | 2.3.3     | Device             | 125                   | 1,901                       | 1,998                                            | 738                                 | 36.9%        | 40.8%                                | 48.7% |
|              | 2.3.3.4   | Musical instrument | 26                    | 427                         | 341                                              | 135                                 | 39.6%        | 46.3%                                | 53.4% |
|              | 2.3.4     | Equipment          | 37                    | 738                         | 892                                              | 247                                 | 27.7%        | 44.1%                                | 54.8% |
|              | 2.4       | Structure          | 57                    | 1,035                       | 1,488                                            | 539                                 | 36.2%        | 45.9%                                | 53.6% |
| Vit-Large    | 2         | Artifact           | 522                   | 8,397                       | 7,374                                            | 6,458                               | <b>87.6%</b> | 54.3%                                | 63.2% |
|              | 2.1.1.1   | Clothing           | 49                    | 670                         | 668                                              | 285                                 | 42.7%        | 53.0%                                | 64.7% |
|              | 2.2       | Covering           | 90                    | 1,287                       | 1,283                                            | 546                                 | 42.6%        | 52.5%                                | 63.0% |
|              | 2.3.1     | Container          | 99                    | 1,528                       | 1,401                                            | 680                                 | 48.5%        | 56.7%                                | 66.6% |
|              | 2.3.1.2   | Wheeled vehicle    | 43                    | 879                         | 616                                              | 331                                 | <b>53.7%</b> | 63.1%                                | 71.1% |
|              | 2.3.3     | Device             | 125                   | 1,901                       | 1,228                                            | 501                                 | 40.8%        | 49.5%                                | 57.3% |
|              | 2.3.3.4   | Musical instrument | 26                    | 427                         | 211                                              | 115                                 | <b>54.5%</b> | 59.7%                                | 66.8% |
|              | 2.3.4     | Equipment          | 37                    | 738                         | 509                                              | 150                                 | 29.5%        | 52.1%                                | 62.7% |
|              | 2.4       | Structure          | 57                    | 1,035                       | 1,200                                            | 402                                 | 33.5%        | 55.1%                                | 63.6% |
